# Supplementary material
Source: publisher site journal article supplement (https://kjim.org/upload/media/kjim-2024-364-Supplementary-Table-2.pdf)
Supplement: Supplementary file 1 [file kjim-2024-364-Supplementary-Table-2.pdf]

**Supplementary Table 2. Independent predictors for atrioventricular block in patients who received ILR implantation for unexplained syncope**

| Variable                                            | Univariate analysis |                | Multivariate analysis <sup>a)</sup> |                |
|-----------------------------------------------------|---------------------|----------------|-------------------------------------|----------------|
|                                                     | HR (95% CI)         | <i>p</i> value | HR (95% CI)                         | <i>p</i> value |
| Age                                                 | 1.005 (0.979–1.031) | 0.721          | 0.987 (0.940–1.035)                 | 0.585          |
| Sex, male                                           | 0.938 (0.416–2.112) | 0.877          | 0.787 (0.186–3.321)                 | 0.743          |
| Diabetes mellitus                                   | 1.853 (0.766–4.483) | 0.171          | 2.842 (0.757–10.677)                | 0.122          |
| Hypertension                                        | 1.505 (0.673–3.366) | 0.320          | 1.692 (0.407–7.038)                 | 0.470          |
| Structural heart disease <sup>b)</sup>              | 1.038 (0.412–2.615) | 0.938          | 0.994 (0.282–3.495)                 | 0.992          |
| Bradycardia less than 60 BPM                        | 1.091 (0.433–2.751) | 0.853          | 0.441 (0.081–2.409)                 | 0.345          |
| PR interval, per 1 ms increase                      | 1.013 (1.006–1.021) | < 0.001        | 1.011 (0.994–1.029)                 | 0.196          |
| QRS duration, per 1 ms increase                     | 1.019 (1.003–1.035) | 0.020          | 1.031 (0.995–1.069)                 | 0.096          |
| Any intraventricular conduction delay <sup>c)</sup> | 2.195 (0.748–6.445) | 0.153          | 0.701 (0.095–5.189)                 | 0.728          |
| LVEF, per 1% increase                               | 0.986 (0.933–1.043) | 0.630          | 1.023 (0.942–1.111)                 | 0.591          |
| LAVI $\geq$ 34 mL/m <sup>2</sup>                    | 1.128 (0.379–3.363) | 0.829          | 1.289 (0.344–4.823)                 | 0.707          |

ILR, implantable loop recorder; HR, hazard ratio; CI, confidence interval; BPM, beats per minute; LVEF, left ventricular ejection fraction; LAVI, left atrial volume index; ICMP, ischemic cardiomyopathy; DCMP, dilated cardiomyopathy; HCMP, hypertrophic cardiomyopathy; RBBB, right bundle branch block; LBBB, left bundle branch block; LAFB, left anterior fascicular block; LPFB, left posterior fascicular block.

<sup>a)</sup>The discriminant ability of multivariable model was 0.754 (95% CI 0.598–0.910). All variables in Supplementary Table 2 were used for adjustment.

<sup>b)</sup>Structural heart disease included coronary artery disease, ICMP, DCMP, HCMP, other congestive heart failure, and moderate to severe valvular heart disease.

<sup>c)</sup>Any intraventricular conduction delay included RBBB, LBBB, LAFB, LPFB, and bifascicular block.
